# Supplementary material for: What Clinicians Want AI to Measure, and How They Want It Done
Source: Research Square preprint supplement (doi:10.21203/rs.3.rs-6346779/v1), 2025-04-23
Supplement: Supplementary file 1 [file 1fec7bc3098b61fc79dff70e.docx]

Mental picture of the patient and the role of AI

- When you see or are being told about a patient, do you try to form a picture in your head about the patient?
- Is overall health status/degree of frailty/performance status part of the picture you try to form?
- What are your thoughts on the potential for “AI” to support this process of forming a mental picture of the patient? What do you see as the main opportunities and challenges?

Establishing baseline and acute illness severity

- For stable patients at their baseline, what pieces of information help you to establish what their baseline is?
- For acute patients, is it helpful to know what their baseline is, and what degree of acute illness is present on top of that baseline?
- What pieces of information help you to establish that?

Utility and trust in an EHR-derived system

- Do you think there would be utility in a system which could give you an estimate of the baseline status of a patient and of the element of acute illness on top of that?
- If so, when do you think you would use it?
- What would you need to trust such a system?
- What form of validation would you seek, should it predict things? What?
- What would stop you from trusting it?
- How important is the interpretability of a model in this context? What level of explainability would you require to trust and adopt a system that provides insights into a patient's baseline and acute illness severity?
- What are your concerns, if any, about the potential biases or limitations of models in this context? How do you think these could be addressed?

Implementation and visualisation of an EHR-derived system

- How would you want the system to be implemented?
- Do you want it to tell you stuff you don't already know - with a risk it is wrong, or to make an estimation of something you can work out yourself, but potentially save time?
- How would you like to visualise the baseline and acute dimensions?
- Would you want a breakdown into domains? If so, what domains?
- Do you think the system should trigger alarms? If so, why? If not, why not?

Ethical considerations and collaboration in AI development for healthcare

- In your opinion, what are the key ethical considerations that should guide the development and implementation of AI systems in healthcare, particularly those focused on clinical decision support?
- How do you envision the ideal collaboration between healthcare workers and AI researchers in developing these tools?
- What would you like to see in this collaborative process to ensure that the AI systems developed are trustworthy, unbiased, and aligned with the needs of healthcare professionals and patients?
